# Supplementary material
Source: PubMed Central journal article supplement (PMC4390081)

## Supporting information for:

Peroxidase reactions suggest a heterolytic/nucleophilic O-O joining mechanism in chlorite dismutase †

Jeffrey A. Mayfield,<sup>1</sup> Béatrice Blanc,<sup>1</sup> Kenton Rodgers,<sup>2</sup> Gudrun Lukat-Rodgers,<sup>2</sup> and Jennifer L. DuBois<sup>3,\*</sup>

<sup>1</sup>Department of Chemistry and Biochemistry, University of Notre Dame, Notre Dame, Indiana 46556

<sup>2</sup>Department of Chemistry and Biochemistry, North Dakota State University, Fargo, North Dakota 58108-6050

<sup>3</sup>SRI, International, Harrisonburg, Virginia 22802

## Contents:

### Figures S1-S10

**Figure S1.** Pseudo first order rate constant for Compound I formation from the reaction of ferric *DaCld* WT with PAA, measured as a function of [PAA] in 0.2 M citrate-phosphate buffer at pH 6, 20 °C. The apparent second order rate constant  $k = 1.9 \pm 0.003 \times 10^5 \text{ M}^{-1}\text{s}^{-1}$ .

**Figure S2.** Time-resolved RR spectra for the reaction of *DaCld* WT with 3 equivalents of PAA at pH 5.8. The reaction mixture contains 68  $\mu\text{M}$  *DaCld* WT and 200  $\mu\text{M}$  PAA in 0.2 M phosphate buffer pH 5.8. Each spectrum represents a 15 s acquisition using 406.7 nm as the excitation frequency with 12 mW at the sample. The reaction was performed in a spinning NMR tube at 20 °C. Visible spectrum for these reaction times show the 404 nm species described in the text. Inset: The RR spectrum of the ferryl component of the reaction mixture obtained by subtracting the appropriate amount of Fe(III) resting enzyme spectrum (black) (as judged by the loss of the  $1494 \text{ cm}^{-1} \nu_3$ ) from the reaction mixture spectrum obtained in 15 s (red).

**Figure S3.** The X-band EPR spectrum of *DaCld* reacted with PAA pH 5.8. *DaCld* (22  $\mu\text{M}$ , final concentration) reacted with 9 equivalents of PAA at 22 °C was flash frozen in an acetone/liquid nitrogen bath after 14 s reaction time. Instrument parameters were 200 G sweep width, 4 G modulation amplitude, 2.0 mW power, 100 kHz modulation frequency, and 77K temperature.

**Figure S4.** Plot of  $\nu_4$  frequency as a function of time for the reaction of *DaCld* with PAA at pH 8.0. The reaction mixture contains 58  $\mu\text{M}$  *DaCld* WT and 480  $\mu\text{M}$  PAA in 0.2 M phosphate buffer pH 8.0. Each black point represents the  $\nu_4$  from a 15 s spectrum using 406.7 nm excitation. The solid red line is a single exponential fit that indicates a  $t_{1/2}$  of  $\sim 100\text{s}$ . It is possible that other processes that are involved in the ultimate

bleaching of the enzyme are occurring in addition to Compound II conversion to resting enzyme .

**Figure S5.** Intermediates in the reaction of *DaCld* WT with PAA. Approximately ~15  $\mu\text{M}$  *DaCld* WT (7.5  $\mu\text{M}$  final) was mixed with 100  $\mu\text{M}$  peracetic acid (50  $\mu\text{M}$  final) all in 0.2 M citrate-phosphate buffer at pH 6, 20 °C. The spectrum of the first intermediate,  $[\text{Fe}^{\text{IV}}=\text{O}(\text{P}\cdot^+)]$ , is shown in red. The spectrum for the second intermediate ( $[\text{Fe}^{\text{IV}}=\text{O}(\text{P})(\text{AA}\cdot^+)]$  or  $[\text{Fe}^{\text{IV}}=\text{O}(\text{P})+(\text{AA}\cdot^+)]$  or  $[\text{Fe}^{\text{IV}}=\text{O}(\text{P})]$  or a mixture of any of those species) formed after 8.7 seconds, is in blue. The final spectrum after 300 second is shown in green, intervening spectra are omitted for clarity.

**Figure S6.** Pseudo first order rate constants for the reaction of *DaCld* WT Compound I with ascorbate (top) and for the conversion of  $[\text{Fe}^{\text{IV}}=\text{O}(\text{P})+(\text{AA}\cdot^+)]$  and Compound II to the ferric species (bottom) as a function of [ascorbate] in 0.2 M citrate-phosphate buffer at pH 6, 20 °C. The slope of the line for the top plot yields the second order rate constant of  $k = 2.5 \pm 0.3 \times 10^6 \text{ M}^{-1}\text{s}^{-1}$ . The bottom plot was fit to a square hyperbola to yield a maximum rate of  $9.3 \pm 0.5 \text{ s}^{-1}$  and apparent  $K_d = 3.5 \pm 1.2 \mu\text{M}$ .

**Figure S7.** Pseudo first order rate constants for ferric *DaCld* WT formation from the intermediate in the reaction of ferric *DaCld* with peracetic acid in 0.2 M citrate-phosphate buffer at pH 8, 20 °C., measured as a function of [PAA]. The second order rate constant is  $k = 1.3 \pm 0.01 \times 10^6 \text{ M}^{-1}\text{s}^{-1}$ .

**Figure S8.** Pseudo first order rate constants for the reaction of intermediate formed at pH 8 in the reaction of *DaCld* WT with PAA and ascorbate as a function of [ascorbate] in 0.2 M citrate-phosphate buffer at pH 8, 20 °C. . The plot was fit to a square hyperbola to yield a maximum rate of  $k = 0.6 \pm 0.01 \text{ s}^{-1}$  and an apparent  $K_d = 3.6 \pm 0.3 \mu\text{M}$ .

**Figure S9.** Pseudo first order rate constants for Compound 0 formation from the reaction of the ferric *DaCld* WT with  $\text{H}_2\text{O}_2$  in 0.2 M citrate-phosphate buffer at pH 6, 20 °C as a function of  $[\text{H}_2\text{O}_2]$ . The measured  $k = 9.6 \pm 0.4 \times 10^1 \text{ M}^{-1}\text{s}^{-1}$ .

**Figure S10.** Pseudo first order rate constants for Compound 0 formation from the reaction of ferric *DaCld* WT and  $\text{H}_2\text{O}_2$  (top) and conversion to Compound II (bottom) as a function of  $[\text{H}_2\text{O}_2]$  0.2 M citrate-phosphate buffer at pH 8, 20 °C.. The slope of the line for the top plot yields the second order rate constant  $k = 1.7 \pm 0.04 \times 10^4 \text{ M}^{-1}\text{s}^{-1}$ . The bottom plot is fit to a square hyperbola yielding a maximum rate of  $k = 7.9 \pm 0.3 \text{ s}^{-1}$  and apparent  $K_d = 1.5 \pm 0.2 \text{ mM}$ .

**Figure S11.** Comparison of *DaCld* potentials to those for HRP as a function of pH.

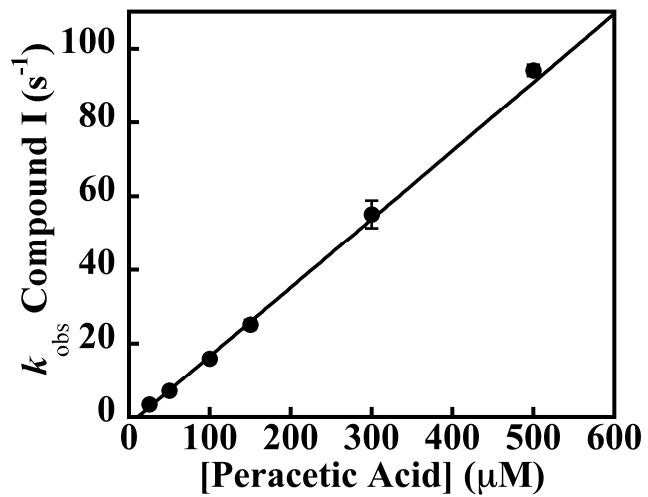

Figure S1.

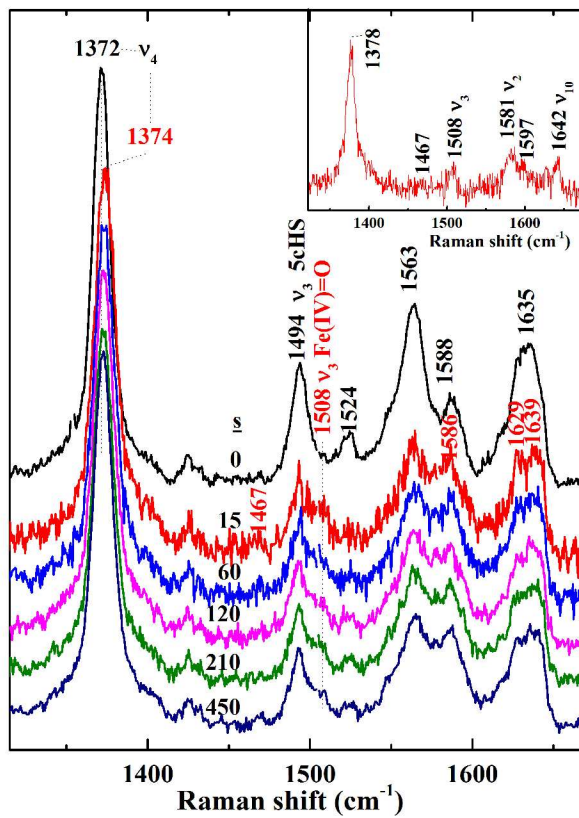

Figure S2.

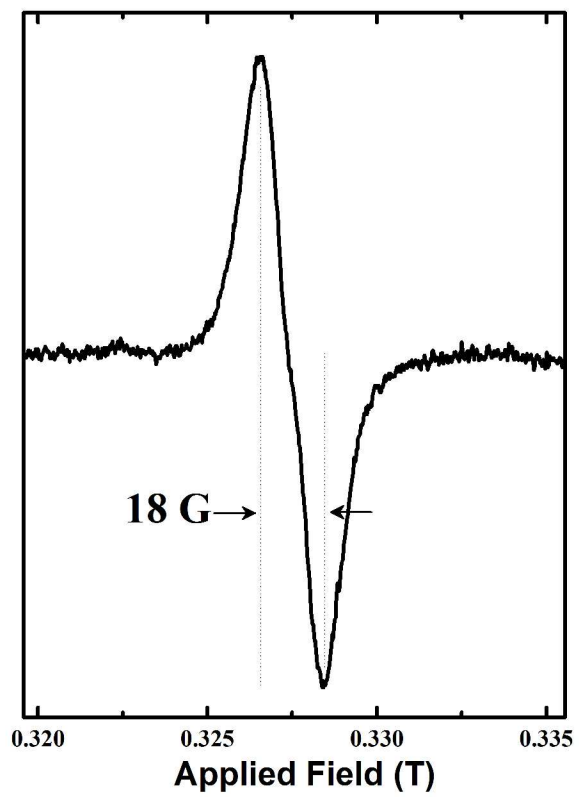

Figure S3.

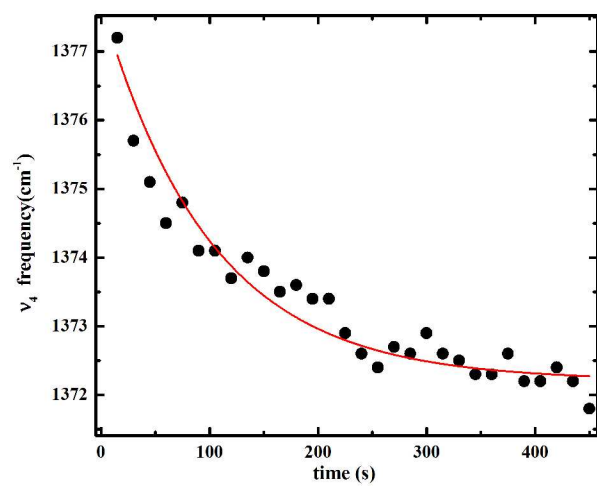

Figure S4.

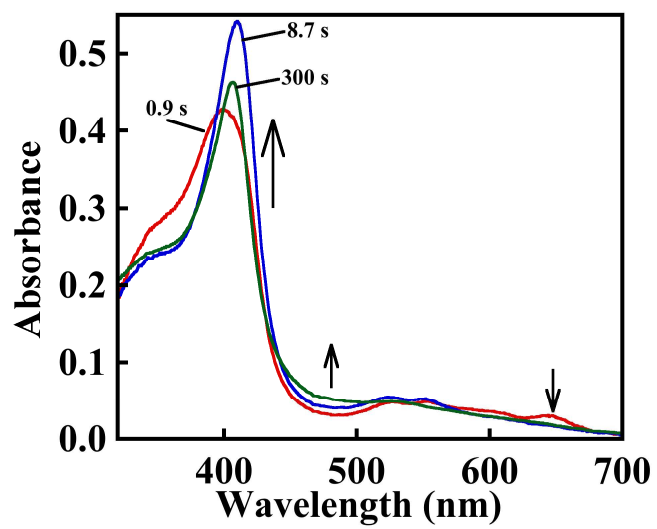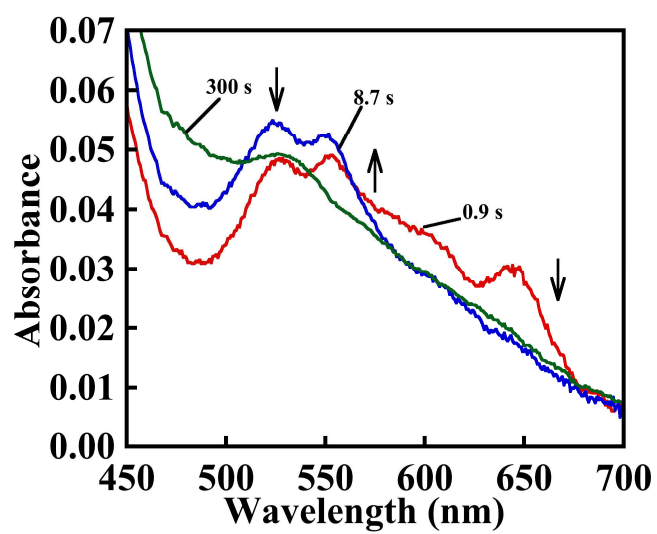

Figure S5.

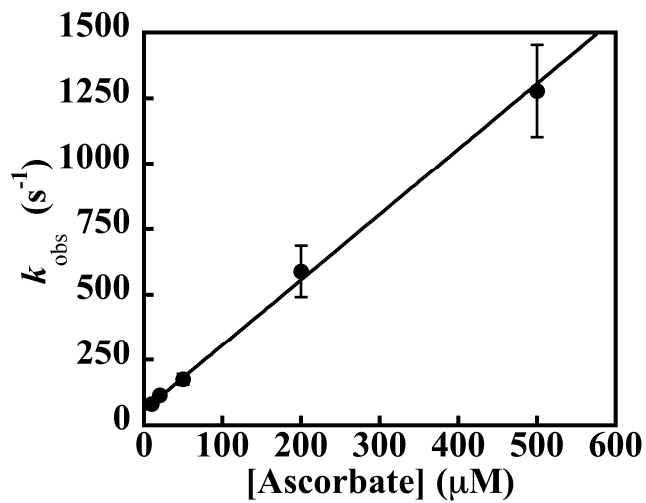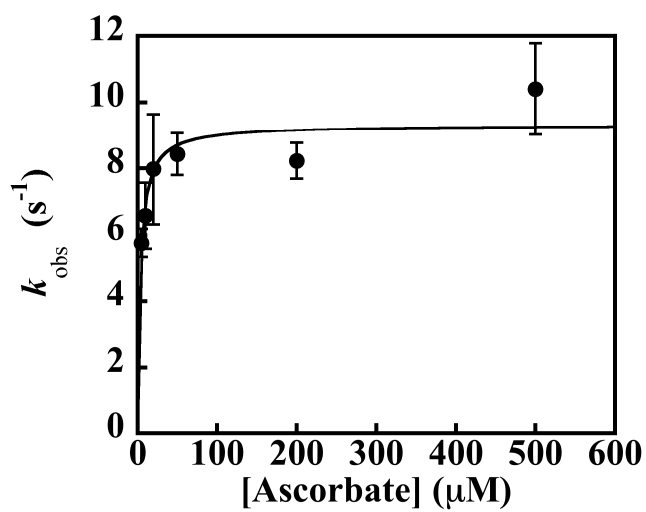

Figure S6.

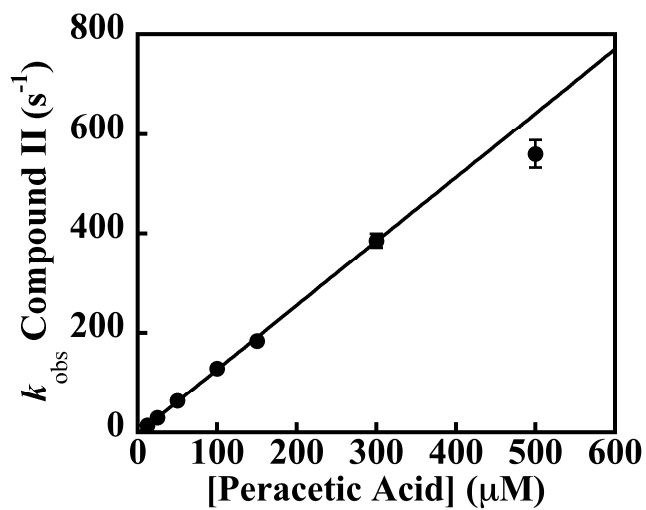

Figure S7.

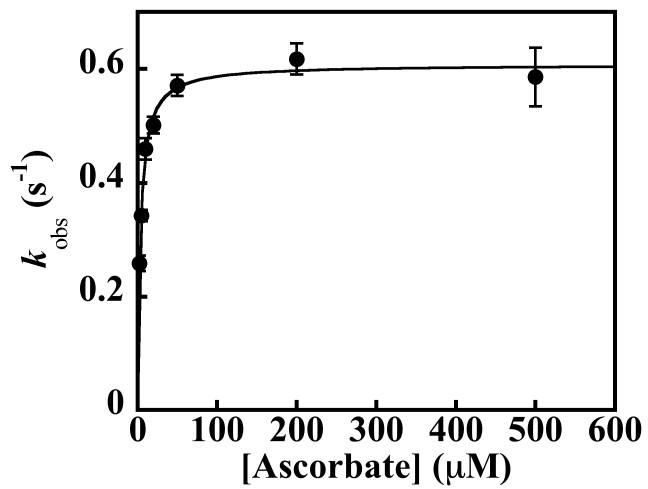

Figure S8.

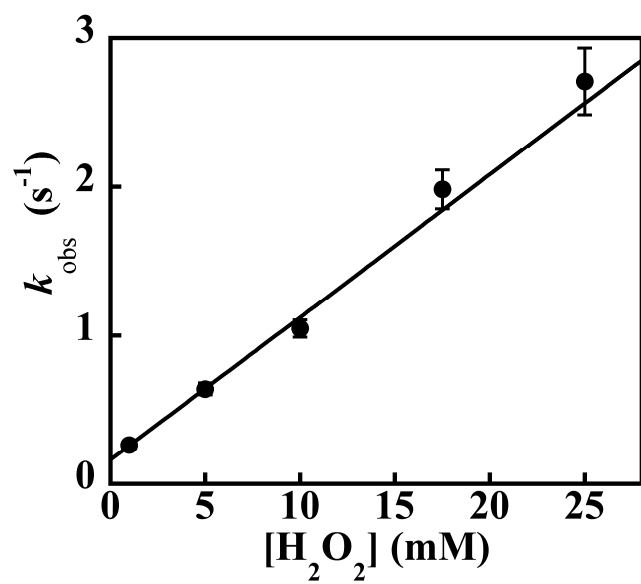

Figure S9.

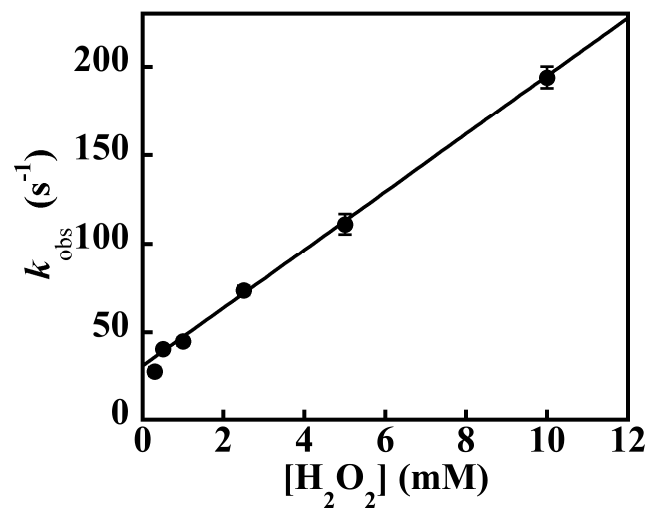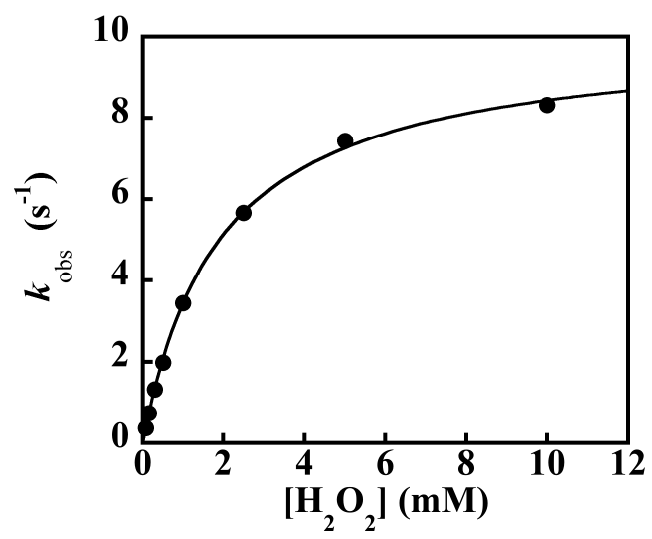

Figure S10.



Estimation of potentials:

Figure S11. The plot illustrates the 0.25 V offset of the *DaCld* potentials relative to the HRP values. The potentials for HRP-C at pH 6.0 are from reference A13. The potential lines for HRP-C are calculated using the Nerst equations whose forms are based on the balanced half cell reactions. The lines for *DaCld* are offset by +0.25V based on the difference in Fe(III)|Fe(II) potentials at pH 7.0.

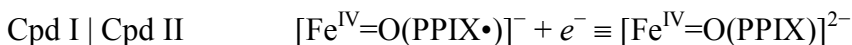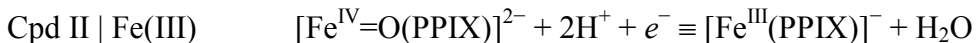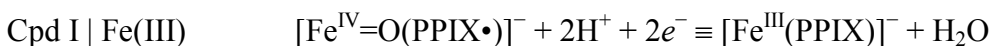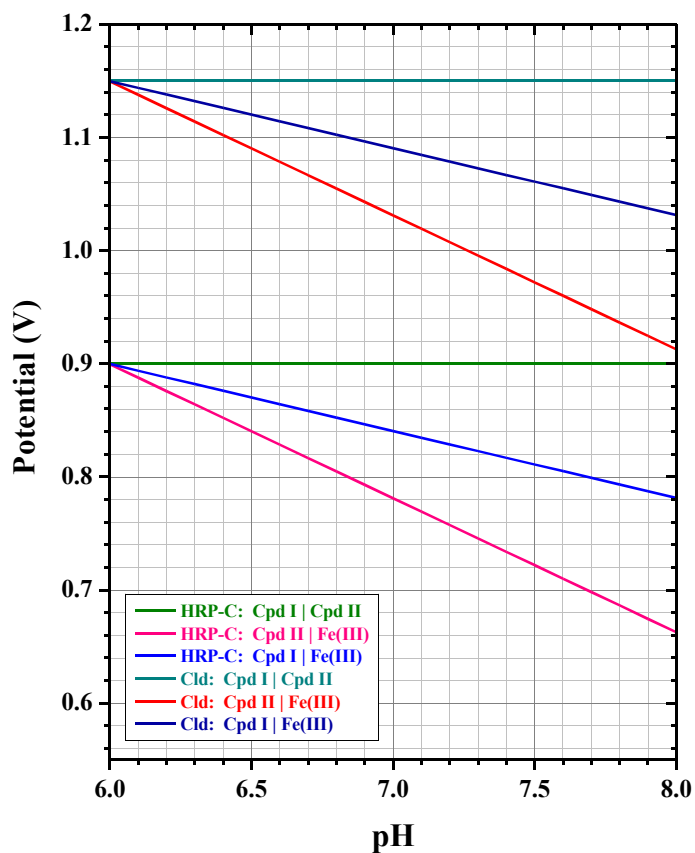

Supplement: NIHMS527146-supplement-1_si_001.pdf [file NIHMS527146-supplement-1_si_001.pdf]
